# Supplementary material for: CTL–doxorubicin (DOX)–gold complex nanoparticles (DOX–AuGCs): from synthesis to enhancement of therapeutic effect on liver cancer model
Source: PubMed Central journal article supplement — Nanoscale Adv. 2020 Sep 29;2(11):5231–41. doi: 10.1039/d0na00758g (PMC9419067; doi:10.1039/d0na00758g), 2020-09-29
Supplement: NA-002-D0NA00758G-s001.pdf [file NA-002-D0NA00758G-s001.pdf]

Supporting Information

**CTL-Doxorubicin (DOX)-Gold complex Nanoparticles  
(DOX-AuGCs): From Synthesis to Enhancement of Therapeutic Effect on Liver Cancer Model**

Quiqian Liu<sup>1‡</sup>, Hui Liu<sup>2‡</sup>, Pasquale Sacco<sup>3-4</sup>, Nadia Djaker<sup>1</sup>, Marc Lamy de la Chapelle<sup>5</sup>,  
Eleonora Marsich<sup>3-4</sup>, Xiaowu Li<sup>2\*</sup>, Jolanda Spadavecchia<sup>1-2\*</sup>

<sup>1</sup> CNRS, UMR 7244, NBD-CSPBAT, Laboratoire de Chimie, Structures et Propriétés de Biomatériaux et d'Agents Thérapeutiques Université Paris 13, Sorbonne Paris Nord, Bobigny, France

<sup>2</sup> Department of hepato-biliary surgery, Shenzhen University General Hospital & Guangdong Provincial Key Laboratory of Regional Immunity and Diseases & Carson International Cancer Shenzhen 518055, China

<sup>3</sup> Department of Life Sciences, University of Trieste, Via L. Giorgieri 5, I-34127 Trieste, Italy

<sup>4</sup> Department of Medicine, Surgery and Health Sciences, University of Trieste, Piazzale Europa 1, I-34127 Trieste, Italy

<sup>5</sup> IMMM – UMR 6283 CNRS, Université du Mans, Avenue Olivier Messiaen, 72085 Le Mans, Cedex 9, France

**Corresponding Author\*:** [lixw1966@163.com](mailto:lixw1966@163.com); [jolanda.spadavecchia@univ-paris13.fr](mailto:jolanda.spadavecchia@univ-paris13.fr)

**Table S1:** z-potential and hydrodynamic diameter of **DOX AuGCs**.

| Synthetic product | Zeta potential (mV) | Hydrodynamic diameter (nm) | PdI         |
|-------------------|---------------------|----------------------------|-------------|
| DOX AuGCs         | -31,4±1,06          | 50 ± 3                     | 0,259±0,002 |

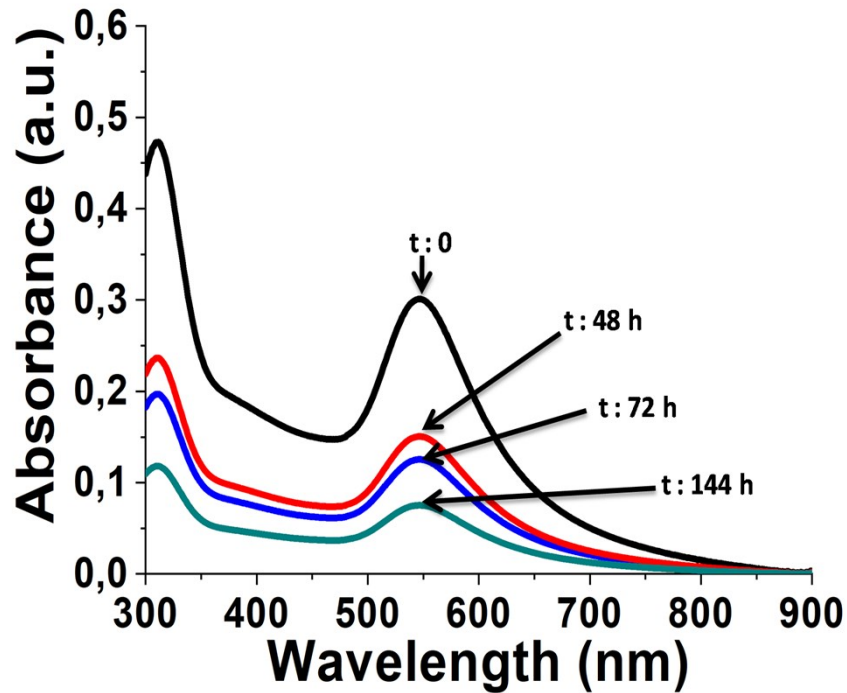

**Figure S1.** UV-Vis spectra of DOX-AuGCs in DMEM as function of time (black spectrum: 0 h, red spectrum: 48 h, blue spectrum: 72 h, green spectrum: 144 h)

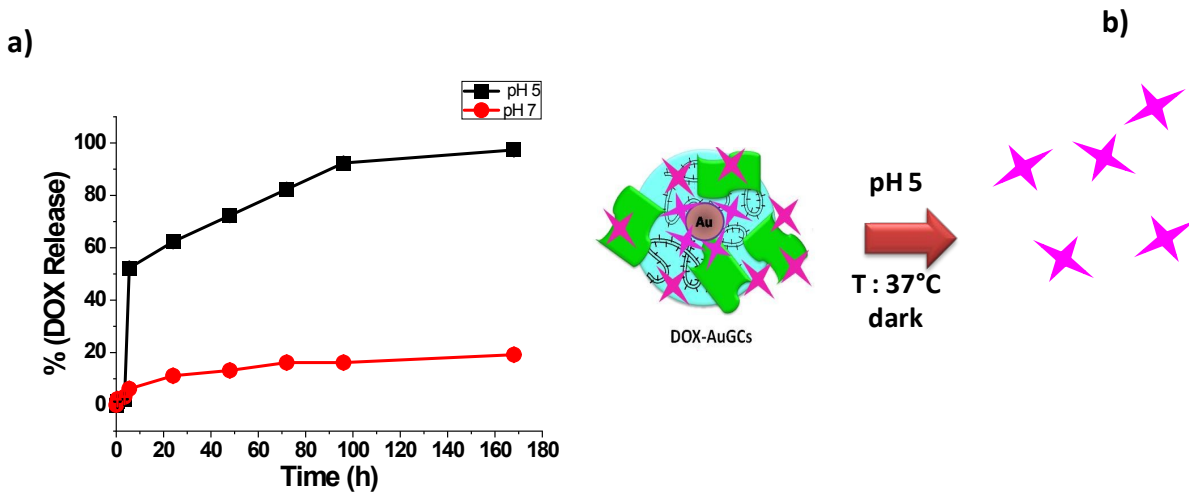

**Figure S2.** (a) Percentage (%) of DOX released from DOX-AuGCs overtime in PBS (37 °C) at pH 7 (red curve) and 5 (black curve). Data are reported as average  $\pm$  standard deviation. (b) Schematic diagram of DOX release under acidic conditions.

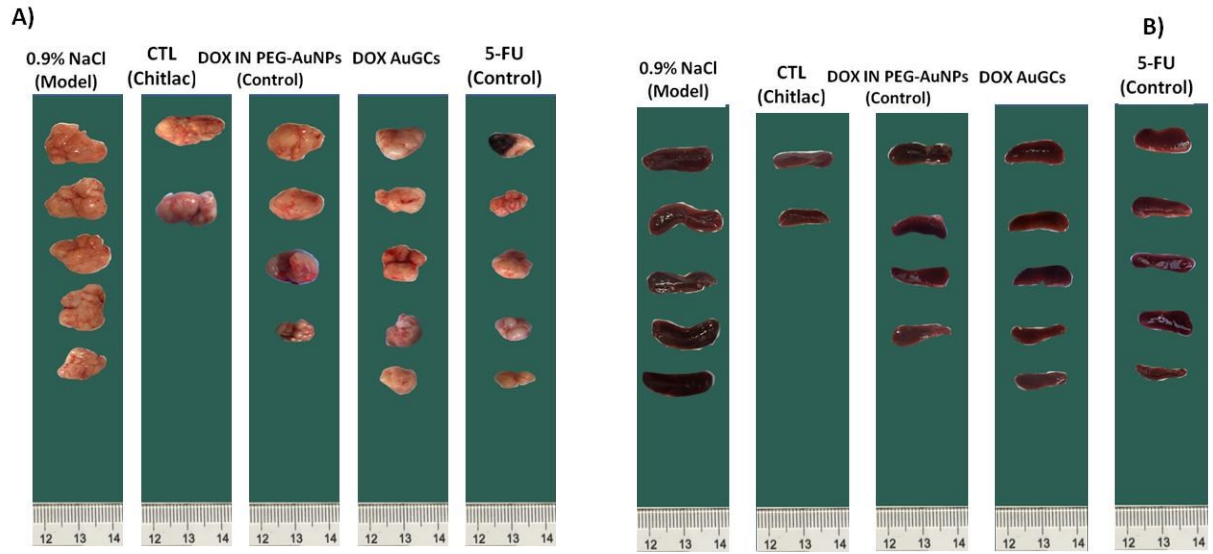

**Figure S 3.** Morphology of the tumor (A) and spleen tissues (B) of each group taken out from the sacrificed mice at the study end point.

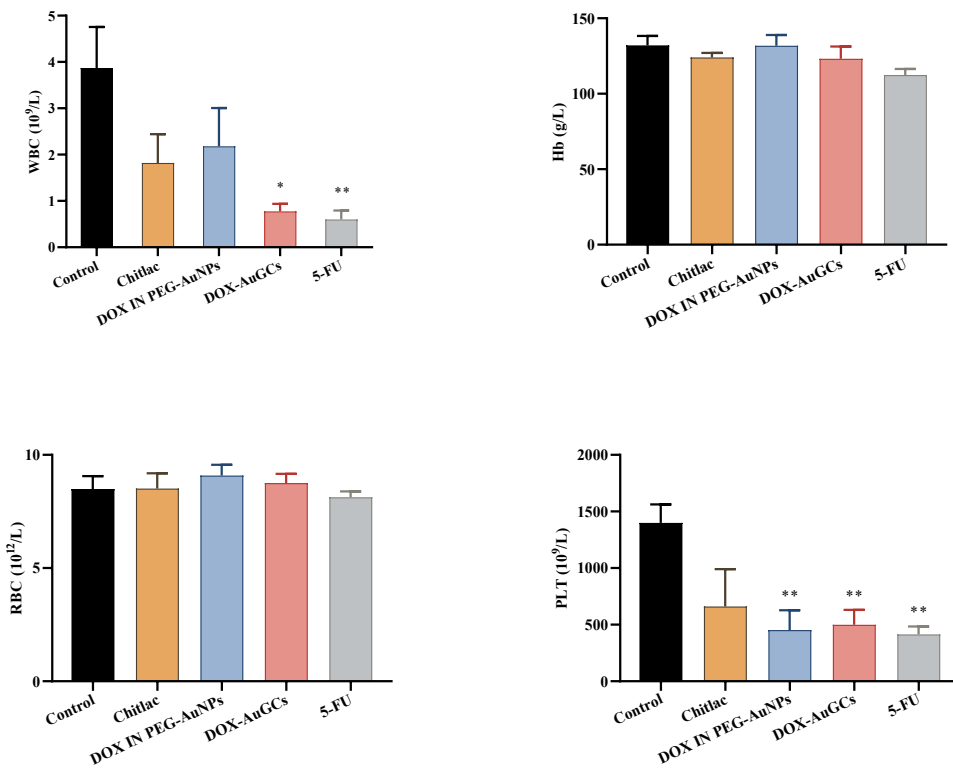

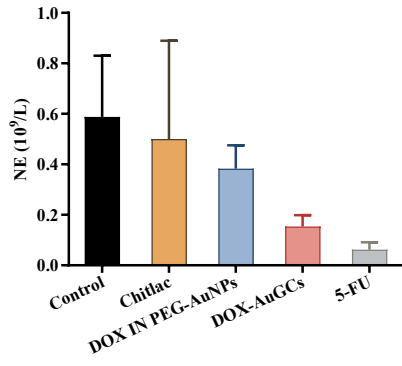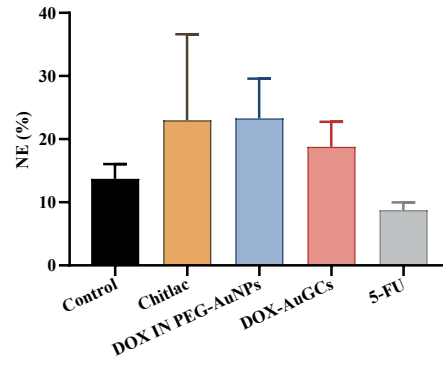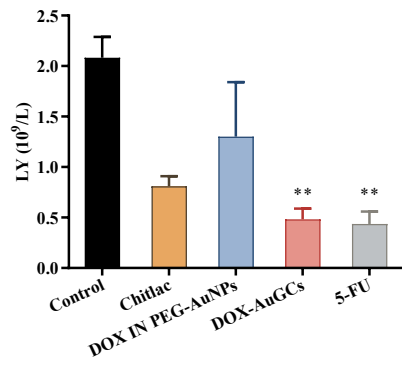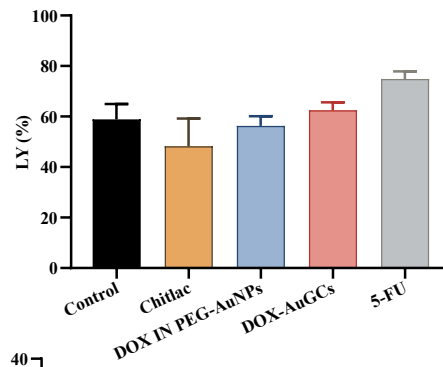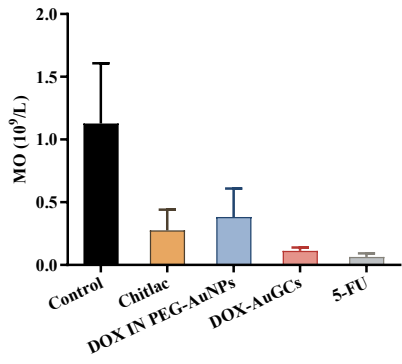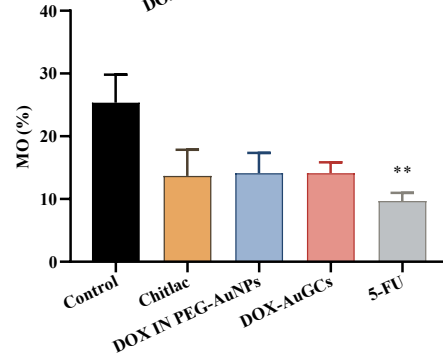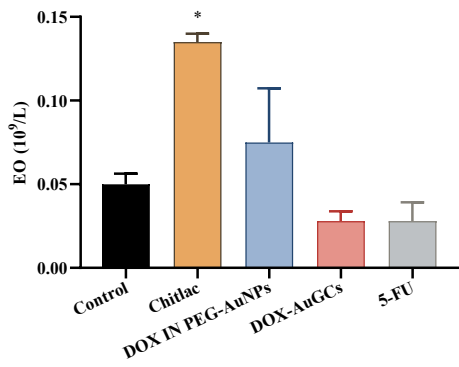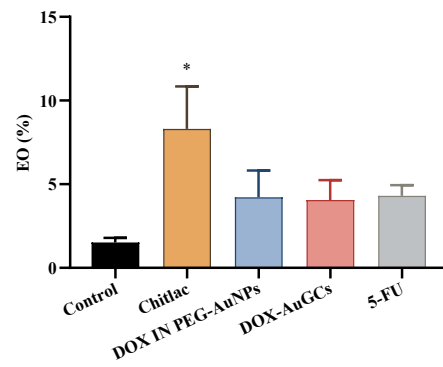

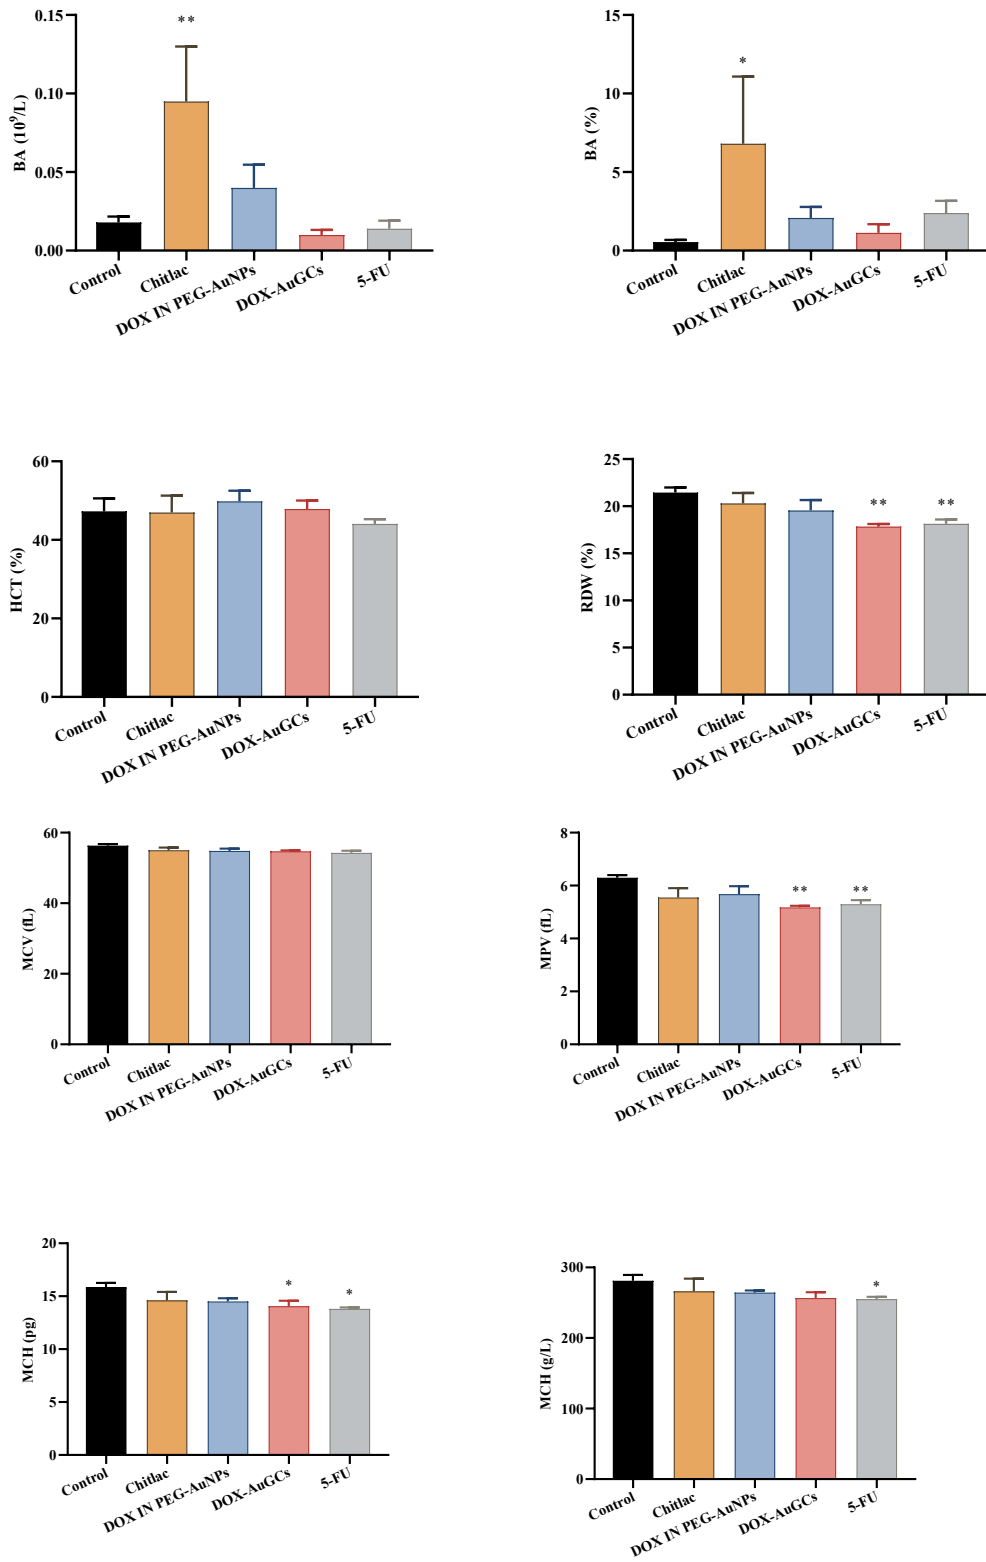

**Figure S4.** Effects of DOX-AuGCs on blood cells. The statistical significance was determined by the paired Student *t*-test (\**P* < 0.05).

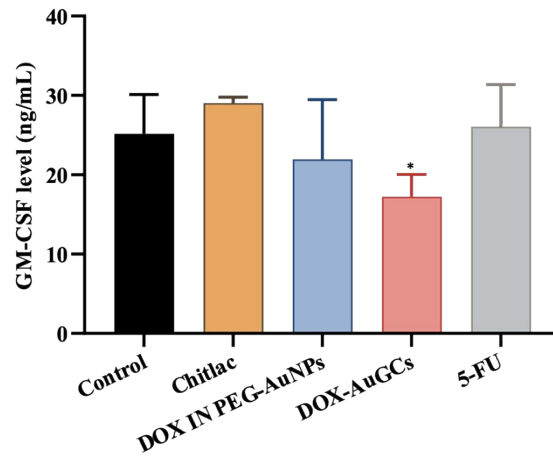

**Figure S5.** Effect of DOX-AuGCs on serum level of GM-CSF. The statistical significance was determined by the paired Student *t*-test (\**P* < 0.05).

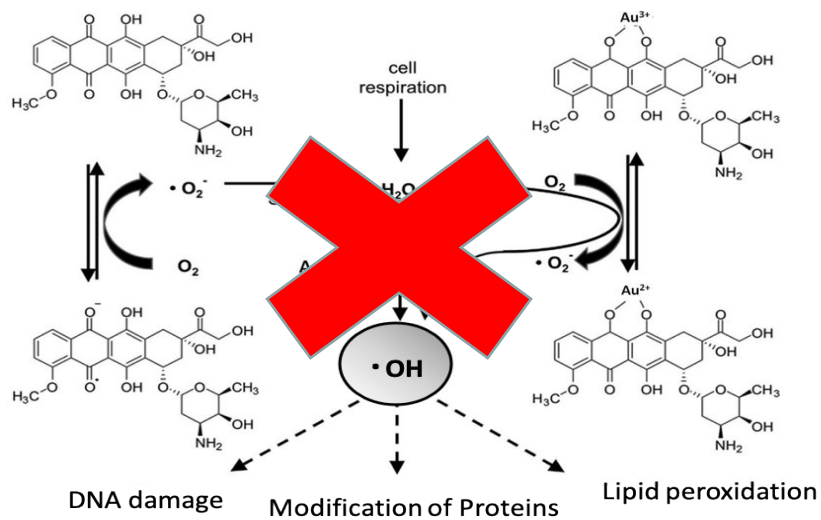

**Scheme S1.** Schematic hypothesis of cardiotoxicity inhibition from DOX AuGCs complex
